# Supplementary material for: Unambiguous Identification of Crystal Plasticity Parameters from Spherical Indentation
Source: MDPI journal article supplement (doi:10.3390/cryst12101341), 2022-09-22
Supplement: s1 [file s1]

Archive with 1 entries (1 files):
- crystals-1898585-supplementary.pdf
