# Supplementary material for: Unambiguous Identification of Crystal Plasticity Parameters from Spherical Indentation
Source: MDPI journal article supplement (doi:10.3390/cryst12101341), 2022-09-22
Supplement: s1 [file s1 › crystals-1898585-supplementary.pdf]

## A supplementary material to:

### Unambiguous Identification of Crystal Plasticity Parameters from Spherical Indentation.

by Karol Frydrych and Stefanos Papanikolaou  
Submitted on September 2022.

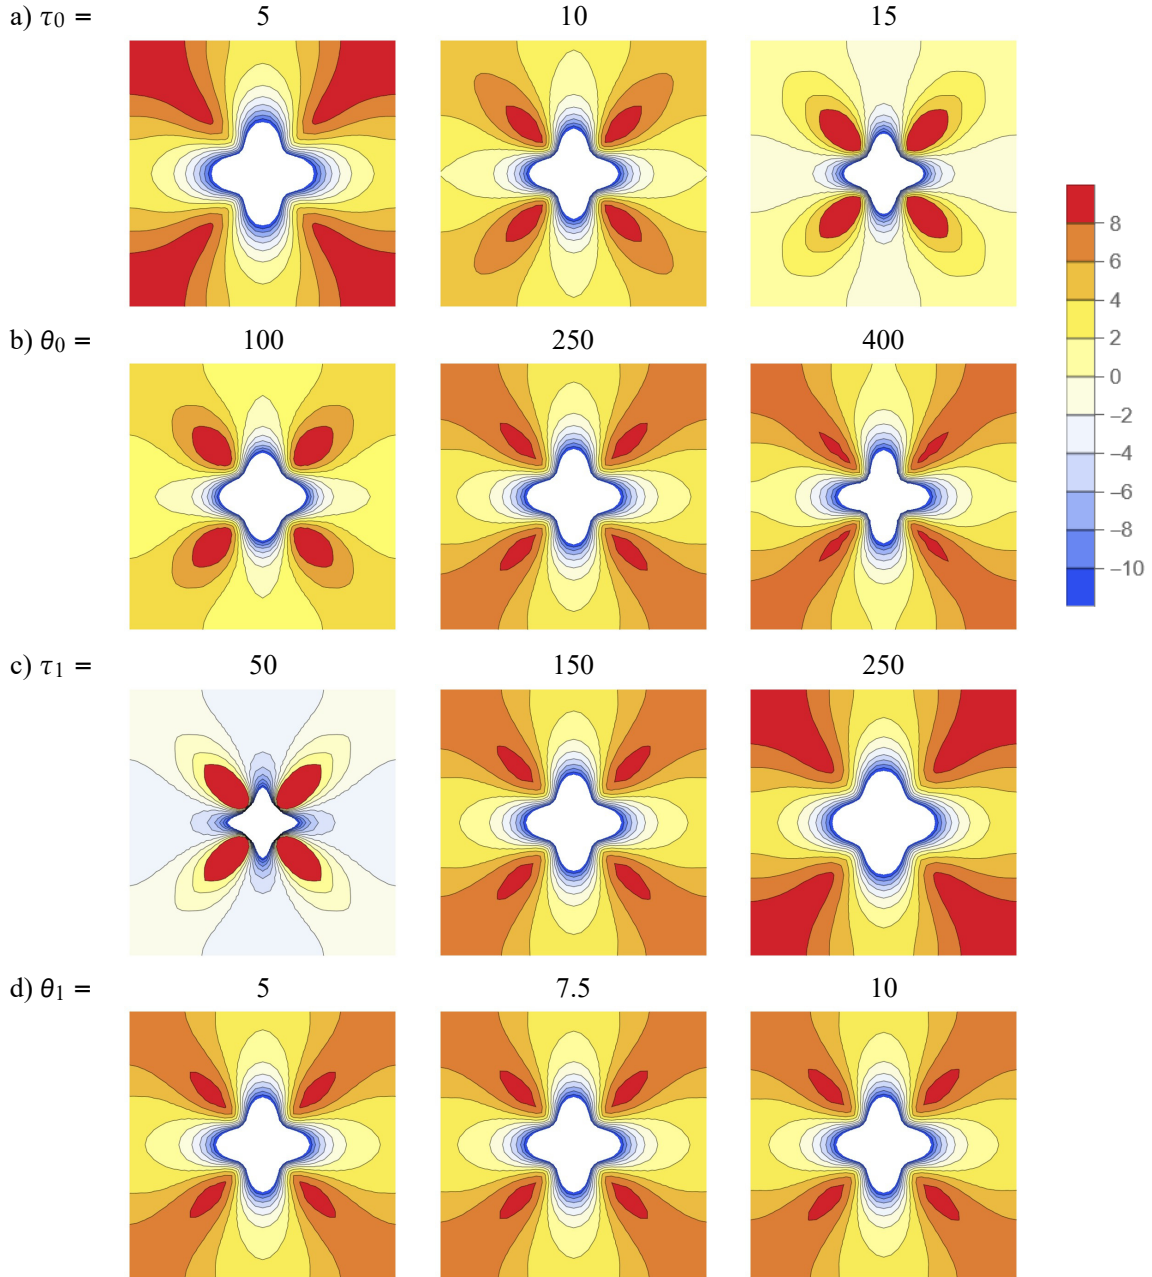

Figure S1: Sensitivity of surface topographies to a)  $\tau_0$ , b)  $\theta_0$ , c)  $\tau_1$  and d)  $\theta_1$  (other parameters were kept fixed). Size of the map is  $2.4\mu\text{m} \times 2.4\mu\text{m}$ . The legend presents the colors related to a vertical displacement value in  $\mu\text{m}$ .
